# Supplementary material for: Recovery priorities in degenerative cervical myelopathy: a cross-sectional survey of an international, online community of patients
Source: PubMed Central journal article supplement (PMC6797315; doi:10.1136/bmjopen-2019-031486), 2019-10-10
Supplement: bmjopen-2019-031486supp001.pdf [file bmjopen-2019-031486supp001.pdf]

**Supplementary Data 1:** Results from the missing data analysis. Patients completing the survey in full, were more likely to have undergone surgery than those who did not ( $p = 0.04$ ). Data is presented as mean +/- standard deviation, unless specified as a percentage. Numbers within brackets indicate data points for the respective variable with incomplete data.

|                                     | <b>INCOMPLETE<br/>SURVEYS<br/>(N&lt;178)</b> | <b>COMPLETED<br/>SURVEYS<br/>(N=481)</b> | <b>P</b> |
|-------------------------------------|----------------------------------------------|------------------------------------------|----------|
| <b>%MALE</b>                        | 16.3% (7/43)                                 | 29.1% (140/481)                          | .076     |
| <b>AGE</b>                          | 55.1 +/-10.9 (43)                            | 53.6 +/- 9.8                             | .344     |
| <b>%SURGERY</b>                     | 35.9% (46/128)                               | 45.9% (221/481)                          | .043     |
| <b>LENGTH OF<br/>SYMPTOMS (YRS)</b> |                                              |                                          | .304     |
| <b>0-1</b>                          | 18.0% (23)                                   | 15.0% (72)                               |          |
| <b>1-3</b>                          | 21.9% (28)                                   | 29.1% (140)                              |          |
| <b>3-10</b>                         | 35.2% (45)                                   | 37.6% (181)                              |          |
| <b>10-25</b>                        | 18.8% (24)                                   | 15.4% (74)                               |          |
| <b>25+</b>                          | 6.3% (8)                                     | 2.9% (14)                                |          |
| <b>LIMB PAIN VAS</b>                | 3.6 +/- 1.9 (17)                             | 3.1 +/- 2.6                              | .854     |
| <b>MJOA</b>                         | 12.2 +/- 3.2 (47)                            | 11.9 +/- 3.0                             | .364     |
