# Supplementary material for: Recovery priorities in degenerative cervical myelopathy: a cross-sectional survey of an international, online community of patients
Source: PubMed Central journal article supplement (PMC6797315; doi:10.1136/bmjopen-2019-031486), 2019-10-10
Supplement: bmjopen-2019-031486supp003.pdf [file bmjopen-2019-031486supp003.pdf]

**Supplementary Data 3:** Mean ranking of recovery domains for dichotomised baseline characteristics. Based on average rankings, the top ranked domain is highlighted. Whilst pain, walking and arm/hand function remained the priorities, for respondents who were male or had undergone surgery, or had impaired upper, lower or bladder function, arm/hand function had the top ranking. For patients with impaired upper limb sensation, walking function was the priority.

|                              | Pain (SD) |       | Arm/Hand (SD) |       | Walking Function (SD) |       | Sexual Function (SD) |       | Bladder/ Bowel (SD) |       | Trunk Function (SD) |       | Sensation (SD) |       |
|------------------------------|-----------|-------|---------------|-------|-----------------------|-------|----------------------|-------|---------------------|-------|---------------------|-------|----------------|-------|
| Gender, Male                 | 3.1       | (2.2) | 3.2           | (1.6) | 2.6                   | (1.6) | 4.2                  | (1.8) | 5.3                 | (1.7) | 4.4                 | (1.6) | 4.2            | (2.3) |
| Gender, Female               | 2.5       | (2.0) | 2.9           | (1.4) | 3.0                   | (1.7) | 4.1                  | (1.6) | 5.9                 | (1.6) | 4.6                 | (1.5) | 4.4            | (2.0) |
| Undergone Surgery            | 2.8       | (2.1) | 3.0           | (1.4) | 2.6                   | (1.6) | 4.1                  | (1.6) | 5.8                 | (1.6) | 4.6                 | (1.6) | 4.5            | (2.0) |
| Not Undergone Surgery        | 2.6       | (2.0) | 2.9           | (1.5) | 3.2                   | (1.7) | 4.2                  | (1.7) | 5.6                 | (1.7) | 4.4                 | (1.5) | 4.2            | (2.1) |
| mJOA Upper Limb Function <3  | 2.9       | (2.0) | 2.1           | (1.3) | 2.5                   | (1.3) | 3.7                  | (1.6) | 6.0                 | (1.7) | 4.4                 | (1.3) | 4.2            | (2.1) |
| mJOA Upper Limb Function >3  | 2.6       | (2.0) | 3.1           | (1.5) | 3.0                   | (1.7) | 4.2                  | (1.7) | 5.7                 | (1.7) | 4.5                 | (1.6) | 4.3            | (2.1) |
| mJOA Lower Limb Function <4  | 2.8       | (2.0) | 2.9           | (1.5) | 2.4                   | (1.5) | 4.1                  | (1.6) | 5.7                 | (1.7) | 4.6                 | (1.4) | 4.3            | (2.1) |
| mJOA Lower Limb Function >4  | 2.6       | (2.1) | 3.0           | (1.5) | 3.2                   | (1.7) | 4.2                  | (1.7) | 5.7                 | (1.7) | 4.5                 | (1.6) | 4.3            | (2.0) |
| mJOA Upper Limb Sensation <2 | 2.7       | (2.1) | 2.6           | (1.3) | 3.0                   | (1.5) | 4.2                  | (1.5) | 5.9                 | (1.6) | 4.5                 | (1.5) | 4.2            | (2.1) |
| mJOA Upper Limb Sensation >2 | 2.6       | (2.0) | 3.2           | (1.6) | 3.0                   | (1.8) | 4.1                  | (1.8) | 5.6                 | (1.7) | 4.5                 | (1.6) | 4.4            | (2.1) |
| mJOA Bladder Function <2     | 2.6       | (1.8) | 2.8           | (1.6) | 2.5                   | (1.4) | 3.6                  | (1.4) | 6.0                 | (1.3) | 4.7                 | (1.6) | 4.7            | (2.0) |
| mJOA Bladder Function >2     | 2.7       | (2.1) | 3.0           | (1.5) | 3.1                   | (1.7) | 4.3                  | (1.7) | 5.6                 | (1.7) | 4.5                 | (1.5) | 4.2            | (2.1) |
| Length of Symptoms <3 years  | 2.9       | (2.2) | 3.0           | (1.5) | 3.1                   | (1.6) | 4.2                  | (1.7) | 5.6                 | (1.7) | 4.6                 | (1.5) | 4.1            | (2.1) |
| Length of Symptoms >3 years  | 2.5       | (1.9) | 2.9           | (1.4) | 2.8                   | (1.7) | 4.1                  | (1.7) | 5.8                 | (1.6) | 4.5                 | (1.5) | 4.5            | (2.1) |
| Best Limb Pain VAS <3        | 2.7       | (2.1) | 3.0           | (1.5) | 2.9                   | (1.7) | 4.2                  | (1.7) | 5.7                 | (1.7) | 4.4                 | (1.5) | 4.6            | (2.0) |
| Best Limb Pain VAS >3        | 2.5       | (2.0) | 2.9           | (1.5) | 3.0                   | (1.6) | 4.1                  | (1.6) | 5.8                 | (1.6) | 4.7                 | (1.6) | 3.9            | (2.2) |
